# Supplementary material for: Cu(ii) complexes with tridentate sulfur and selenium ligands: catecholase and hydrolysis activity
Source: Royal Society of Chemistry journal article supplement (doi:10.1039/d0nj02806a), 2020-01-01
Supplement: d0nj02806a1.pdf [file d0nj02806a1.pdf]

***Supplementary Material***

**Cu(II) complexes with tridentate sulfur and selenium ligands: catecholase and  
hydrolysis activity**

by

**Daniele Cocco Durigon<sup>a</sup>, Marcos Maragno Peterle<sup>a</sup>, Adailton João Bortoluzzi<sup>a</sup>, Ronny  
Rocha Ribeiro<sup>b</sup>, Antonio Luiz Braga<sup>a</sup>, Rosely Aparecida Peralta<sup>a\*</sup>, Ademir Neves<sup>a\*</sup>**

<sup>a</sup> Departamento de Química, Universidade Federal de Santa Catarina, Florianópolis – SC,  
Brazil. CEP 88040-900.

<sup>b</sup> Departamento de Química, Universidade Federal do Paraná, Curitiba – PR, Brazil. CEP  
81531-980

\*Corresponding author: [ademir.neves@ufsc.br](mailto:ademir.neves@ufsc.br); [rosely.peralta@ufsc.br](mailto:rosely.peralta@ufsc.br)

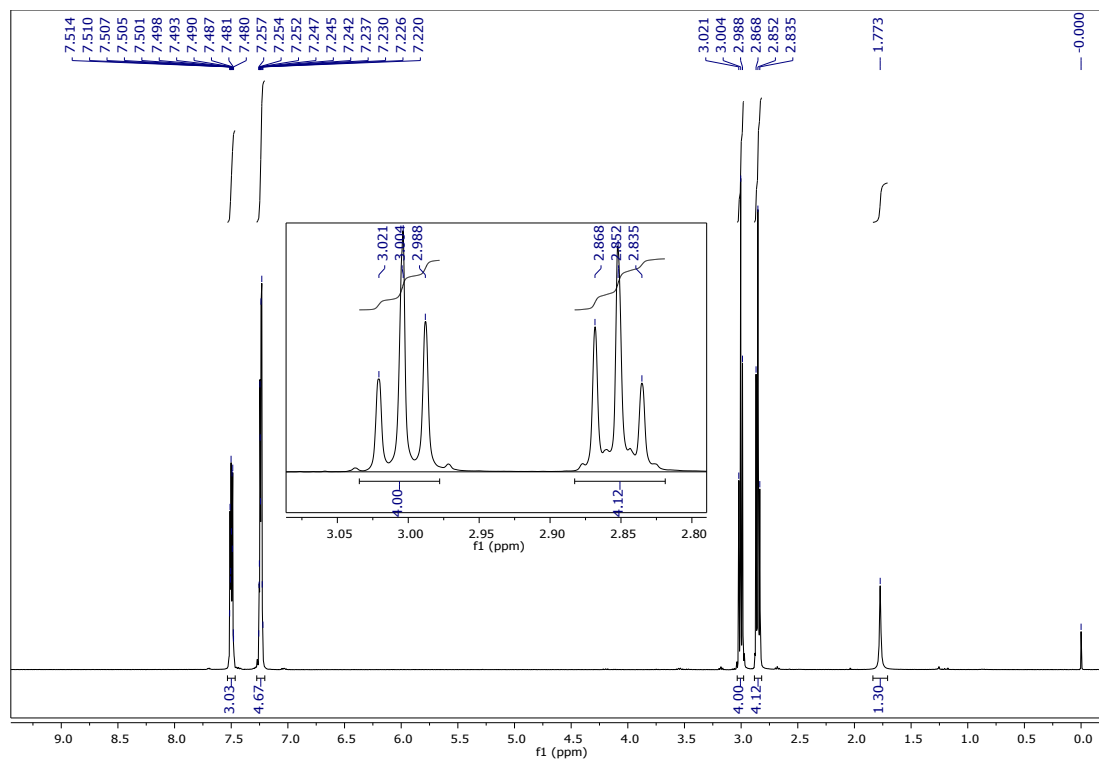

Figure S1  $^1\text{H}$  NMR (400 MHz,  $\text{CDCl}_3$ ) spectrum of  $\text{L}_{\text{se}}$ .

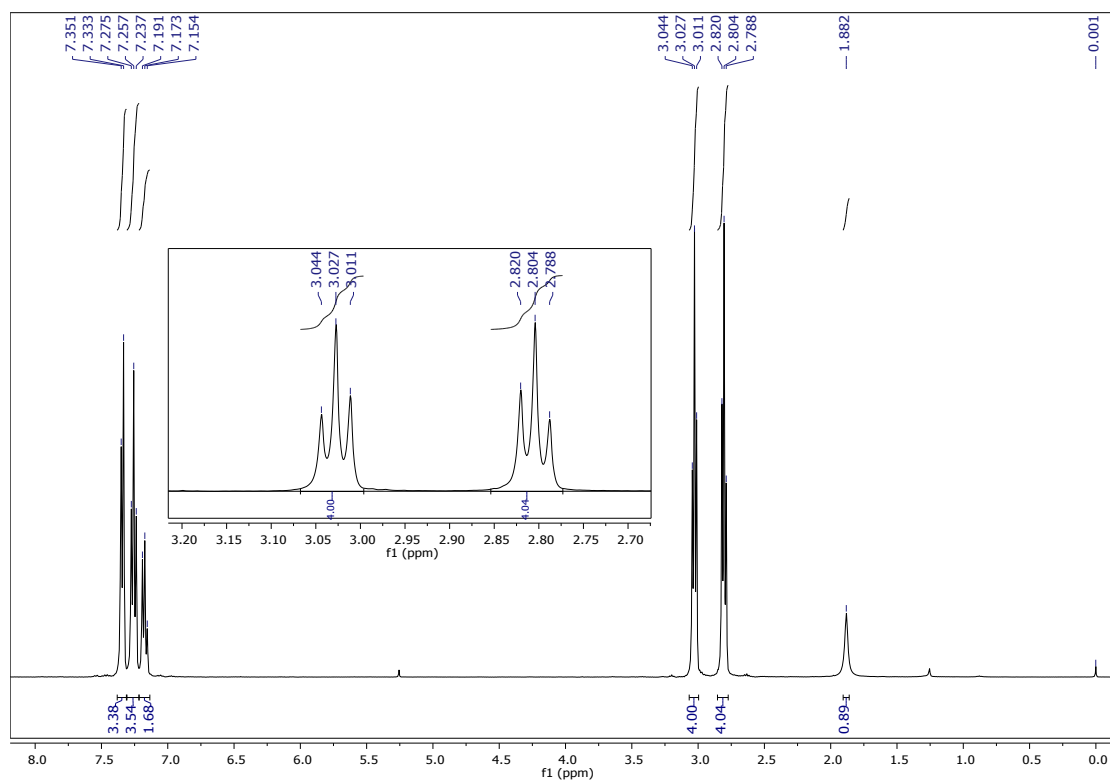

Figure S2  $^1\text{H}$  NMR (400 MHz,  $\text{CDCl}_3$ ) spectrum of  $\text{L}_{\text{s}}$ .

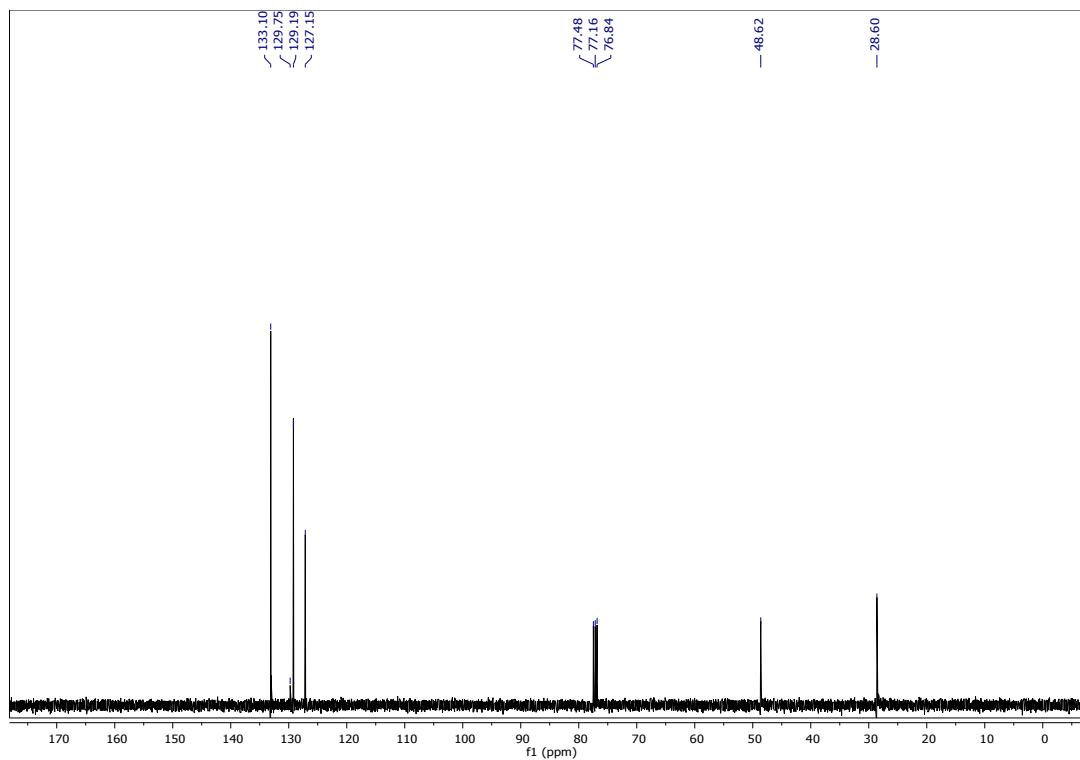

Figure S3  $^{13}\text{C}$  NMR (100 MHz,  $\text{CDCl}_3$ ) spectrum of  $\text{L}_{\text{Se}}$ .

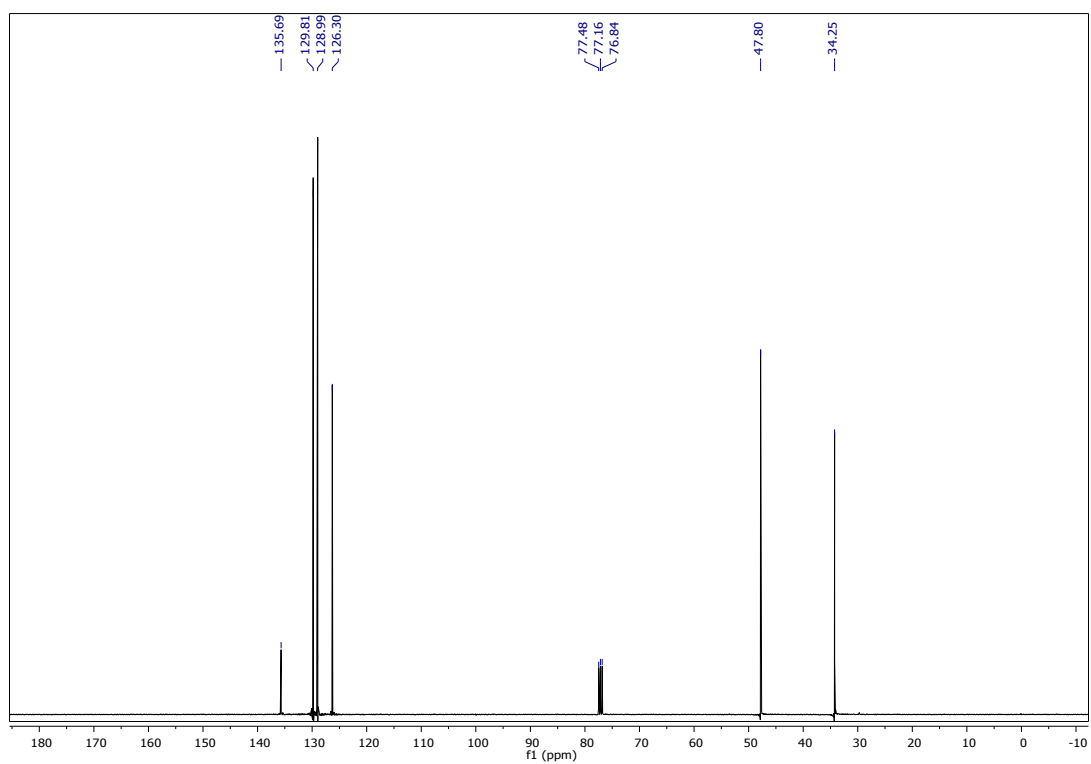

Figure S4  $^{13}\text{C}$  NMR (100 MHz,  $\text{CDCl}_3$ ) spectrum of  $\text{L}_{\text{S}}$ .

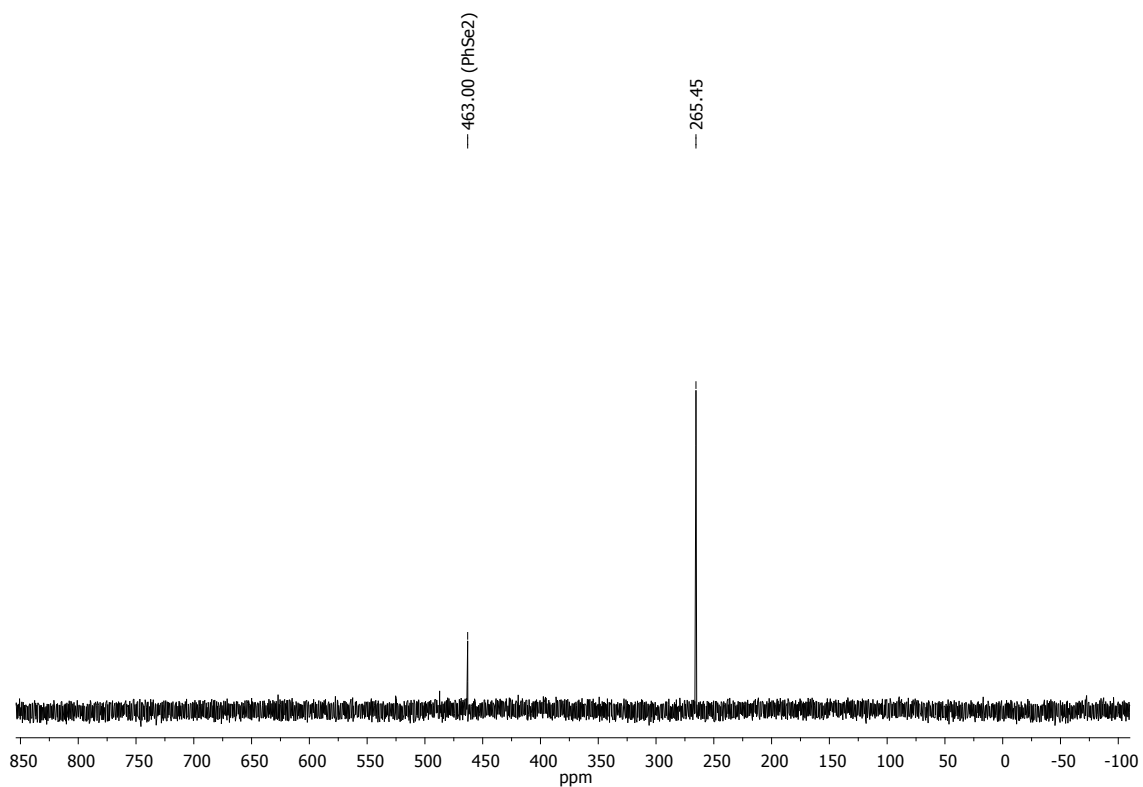

Figure S5  $^{77}\text{Se}$  NMR (76 MHz,  $\text{CDCl}_3$ ) spectrum of  $\text{L}_{\text{Se}}$ .

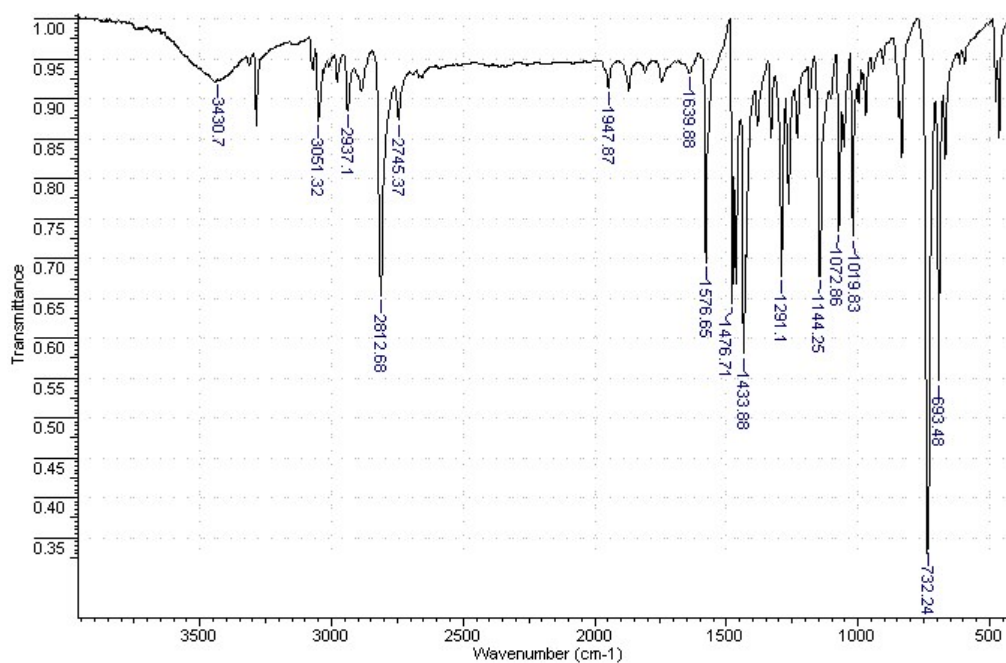

Figure S6 IR (KBr,  $\text{cm}^{-1}$ ) of  $\text{L}_{\text{Se}}$ .

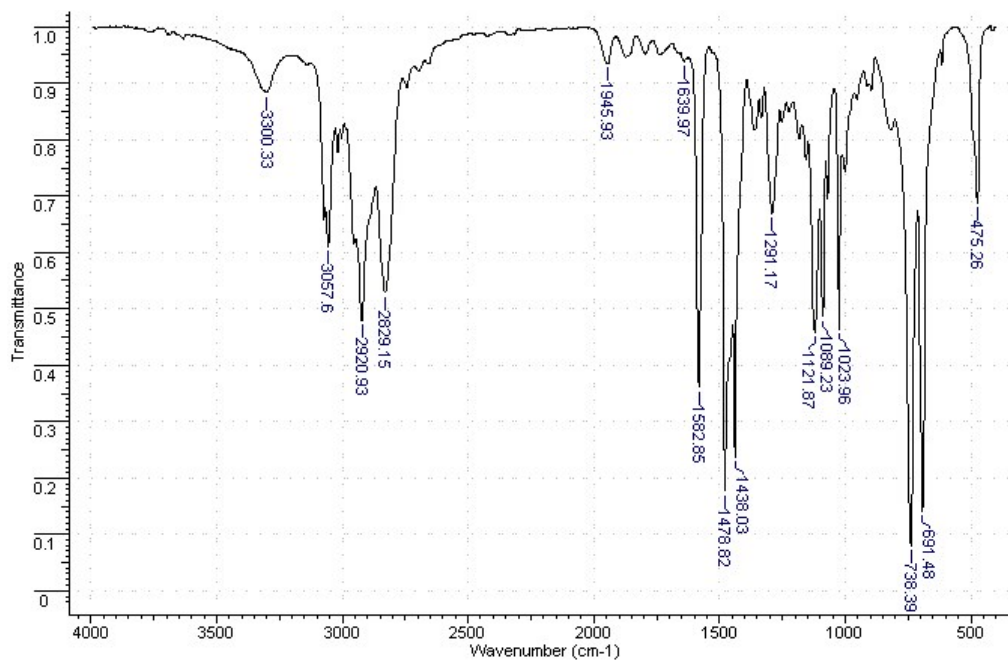

Figure S7 IR (KBr,  $\text{cm}^{-1}$ ) of  $L_5$ .

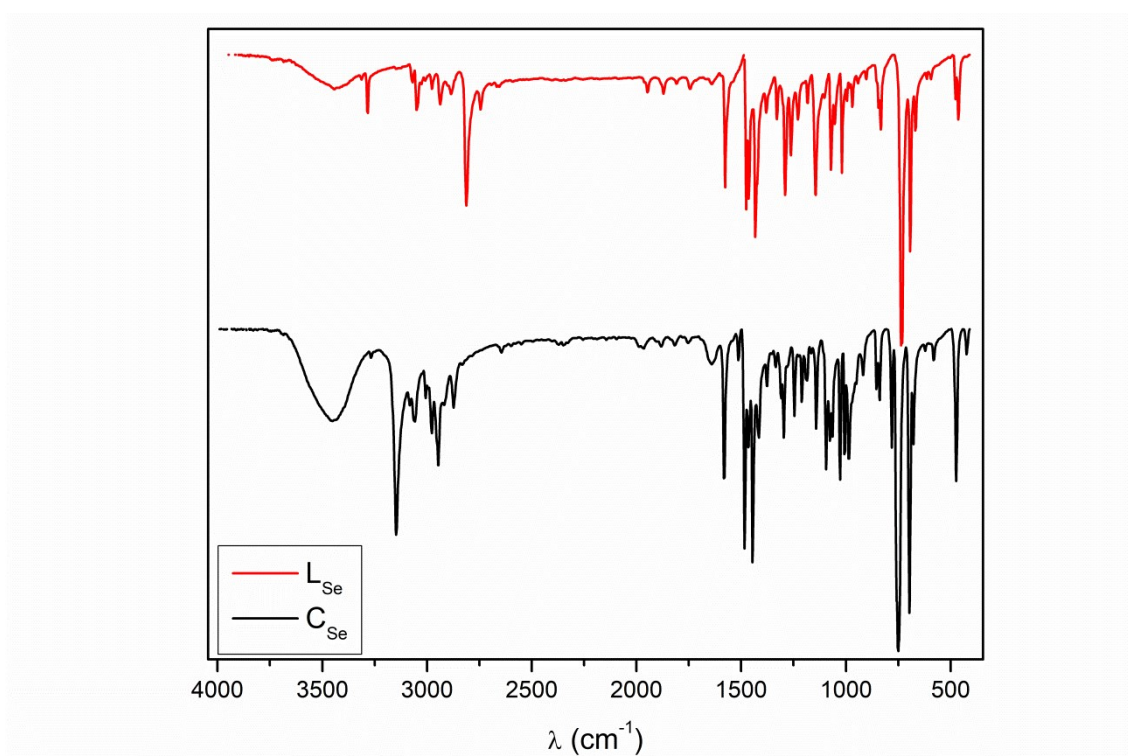

Figure S8 IR spectra overlay of the  $L_{Se}$  (red) and  $C_{Se}$  (black).

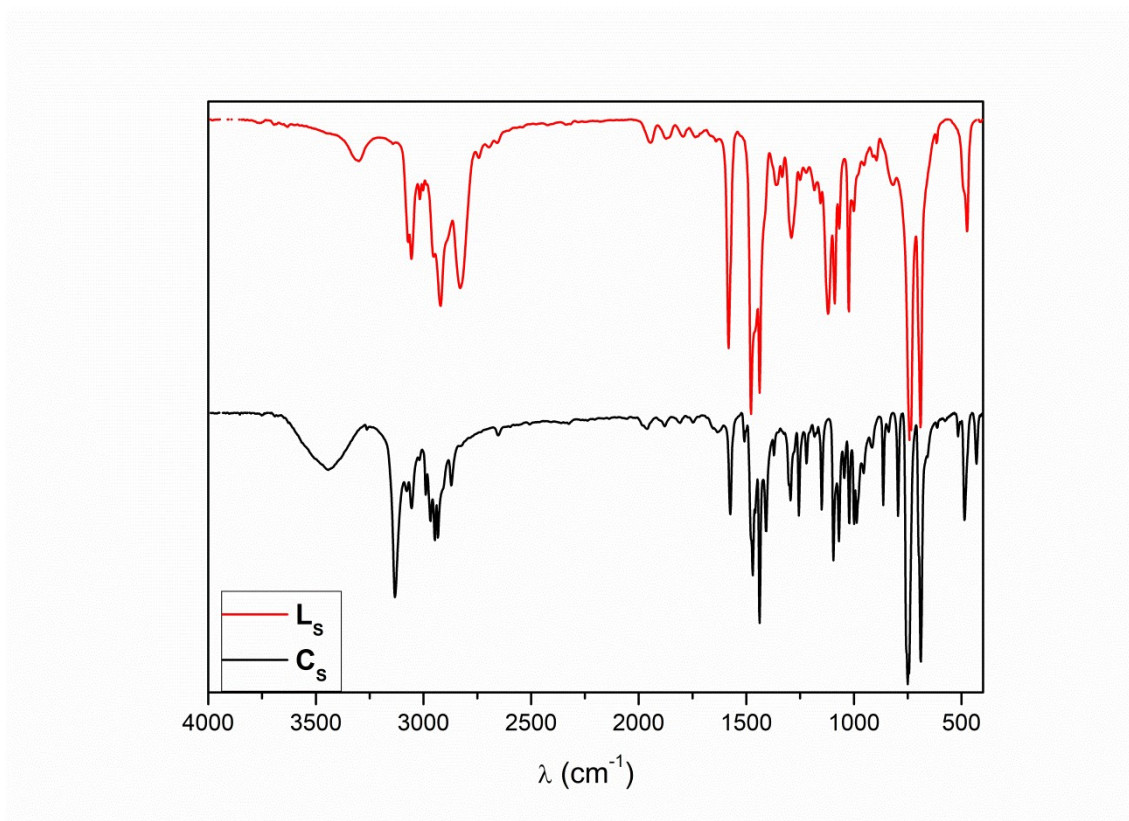

**Figure S9** IR spectra overlay of the  $L_s$  (red) and  $C_s$  (black).

### Crystallographic Data

**Table S1** Bond lengths (Å) and angles (°) for  $C_{Se}$ .

|                      |           |             |           |
|----------------------|-----------|-------------|-----------|
| Cu1-N1               | 2.036(3)  | C1-C2       | 1.516(3)  |
| Cu1-Cl1              | 2.2411(9) | C1-H1A      | 0.9900    |
| Cu1-Cl2              | 2.4076(8) | C1-H1B      | 0.9900    |
| Cu1-Se1              | 2.5196(3) | C2-Se1      | 1.968(2)  |
| Cu1-Se1 <sup>i</sup> | 2.5196(3) | C2-H2A      | 0.9900    |
| N1-C1 <sup>i</sup>   | 1.472(3)  | C2-H2B      | 0.9900    |
| N1-C1                | 1.473(3)  | Se1-C3      | 1.925(2)  |
| N1-H1                | 0.8718    | C3-C4       | 1.384(3)  |
| C3-C8                | 1.385(3)  | C7-H7       | 0.9500    |
| C4-C5                | 1.385(3)  | C8-H8       | 0.9500    |
| C4-H4                | 0.9500    | N1-Cu1-Cl1  | 164.62(8) |
| C5-C6                | 1.385(4)  | N1-Cu1-Cl2  | 96.72(8)  |
| C5-H5                | 0.9500    | Cl1-Cu1-Cl2 | 98.66(3)  |

|                          |             |             |             |
|--------------------------|-------------|-------------|-------------|
| C6-C7                    | 1.382(4)    | N1-Cu1-Se1  | 82.36(3)    |
| C6-H6                    | 0.9500      | Cl1-Cu1-Se1 | 92.312(13)  |
| C7-C8                    | 1.389(4)    | Cl2-Cu1-Se1 | 110.164(10) |
| N1-Cu1-Se1 <sup>i</sup>  | 82.36(3)    | Cu1-N1-H1   | 105.3       |
| Cl1-Cu1-Se1 <sup>i</sup> | 92.312(13)  | N1-C1-C2    | 108.31(19)  |
| Cl2-Cu1-Se1 <sup>i</sup> | 110.164(10) | N1-C1-H1A   | 110.0       |
| Se1-Cu1-Se1 <sup>i</sup> | 138.154(19) | C2-C1-H1A   | 110.        |
| C1 <sup>i</sup> -N1-C1   | 114.2(2)    | N1-C1-H1B   | 110.0       |
| C1 <sup>i</sup> -N1-Cu1  | 111.67(14)  | C2-C1-H1B   | 110.0       |
| C1-N1-Cu1                | 111.67(14)  | H1A-C1-H1B  | 108.4       |
| C1 <sup>i</sup> -N1-H1   | 106.7       | C1-C2-Se1   | 111.00(15)  |
| C1-N1-H1                 | 106.7       | C1-C2-H2A   | 109.4       |
| Se1-C2-H2A               | 109.4       | C3-Se1-C2   | 99.13(10)   |
| C1-C2-H2B                | 109.4       | C3-Se1-Cu1  | 113.30(7)   |
| Se1-C2-H2B               | 109.4       | C2-Se1-Cu1  | 93.56(7)    |
| H2A-C2-H2B               | 108.0       | C4-C3-C8    | 120.2(2)    |
| C4-C3-Se1                | 123.16(17)  | C6-C5-H5    | 119.7       |
| C8-C3-Se1                | 116.59(19)  | C7-C6-C5    | 119.6(3)    |
| C3-C4-C5                 | 119.6(2)    | C7-C6-H6    | 120.2       |
| C3-C4-H4                 | 120.2       | C5-C6-H6    | 120.2       |
| C5-C4-H4                 | 120.2       | C6-C7-C8    | 120.2(3)    |
| C4-C5-C6                 | 120.6(3)    | C6-C7-H7    | 119.        |
| C4-C5-H5                 | 119.7       | C8-C7-H7    | 119.9       |
| C3-C8-C7                 | 119.8(3)    | C7-C8-H8    | 120.1       |
| C3-C8-H8                 | 120.1       |             |             |

Symmetry transformations used to generate equivalent atoms: (i) X, -Y+1.5, Z.

**Table S2** Bond lengths (Å) and angles (°) for C<sub>5</sub>

|                     |            |       |          |
|---------------------|------------|-------|----------|
| Cu1-N1              | 2.0141(18) | C3-C8 | 1.393(2) |
| Cu1-Cl1             | 2.2284(6)  | C4-C5 | 1.391(2) |
| Cu1-Cl2             | 2.4100(6)  | C4-H4 | 0.9500   |
| Cu1-S1              | 2.4500(4)  | C5-C6 | 1.382(3) |
| Cu1-S1 <sup>i</sup> | 2.4501(4)  | C5-H5 | 0.9500   |
| N1-C1               | 1.4769(18) | C6-C7 | 1.382(3) |

|                         |             |            |            |
|-------------------------|-------------|------------|------------|
| N1-C1 <sup>i</sup>      | 1.4770(18)  | C6-H6      | 0.9500     |
| N1-H1                   | 0.8722      | C7-C8      | 1.393(3)   |
| C1-C2                   | 1.515(2)    | C7-H7      | 0.9500     |
| C1-H1A                  | 0.9900      | C8-H8      | 0.9500     |
| C1-H1B                  | 0.9900      | C1-C2-S1   | 111.60(11) |
| C2-S1                   | 1.8303(17)  | C1-C2-H2A  | 109.3      |
| C2-H2A                  | 0.9900      | S1-C2-H2A  | 109.3      |
| C2-H2B                  | 0.9900      | C1-C2-H2B  | 109.3      |
| S1-C3                   | 1.7797(17)  | S1-C2-H2B  | 109.3      |
| C3-C4                   | 1.393(2)    | H2A-C2-H2B | 108.0      |
| N1-Cu1-Cl1              | 164.92(6)   | C3-S1-C2   | 102.00(7)  |
| N1-Cu1-Cl2              | 96.60(6)    | C3-S1-Cu1  | 115.06(5)  |
| Cl1-Cu1-Cl2             | 98.48(2)    | C2-S1-Cu1  | 96.47(5)   |
| N1-Cu1-S1               | 81.774(19)  | C4-C3-C8   | 119.96(16) |
| Cl1-Cu1-S1              | 93.720(12)  | C4-C3-S1   | 123.06(12) |
| Cl2-Cu1-S1              | 107.228(11) | C8-C3-S1   | 116.95(13) |
| N1-Cu1-S1 <sup>i</sup>  | 81.774(19)  | C5-C4-C3   | 119.46(16) |
| Cl1-Cu1-S1 <sup>i</sup> | 93.720(12)  | C5-C4-H4   | 120.3      |
| Cl2-Cu1-S1 <sup>i</sup> | 107.228(11) | C3-C4-H4   | 120.3      |
| S1-Cu1-S1 <sup>i</sup>  | 143.18(2)   | C6-C5-C4   | 120.58(17) |
| C1-N1-C1 <sup>i</sup>   | 114.10(17)  | C6-C5-H5   | 119.7      |
| C1-N1-Cu1               | 111.51(10)  | C4-C5-H5   | 119.7      |
| C1 <sup>i</sup> -N1-Cu1 | 111.51(10)  | C7-C6-C5   | 119.99(18) |
| C1-N1-H1                | 106.9       | C7-C6-H6   | 120.0      |
| C1 <sup>i</sup> -N1-H1  | 106.9       | C5-C6-H6   | 120.0      |
| Cu1-N1-H1               | 105.3       | C6-C7-C8   | 120.17(18) |
| N1-C1-C2                | 107.26(13)  | C6-C7-H7   | 119.9      |
| N1-C1-H1A               | 110.3       | C8-C7-H7   | 119.9      |
| C2-C1-H1A               | 110.3       | C7-C8-C3   | 119.78(17) |
| N1-C1-H1B               | 110.3       | C7-C8-H8   | 120.1      |
| C2-C1-H1B               | 110.3       | C3-C8-H8   | 120.1      |
| H1A-C1-H1B              | 108.5       |            |            |

Symmetry transformations used to generate equivalent atoms: (i) X, -Y+1.5, Z



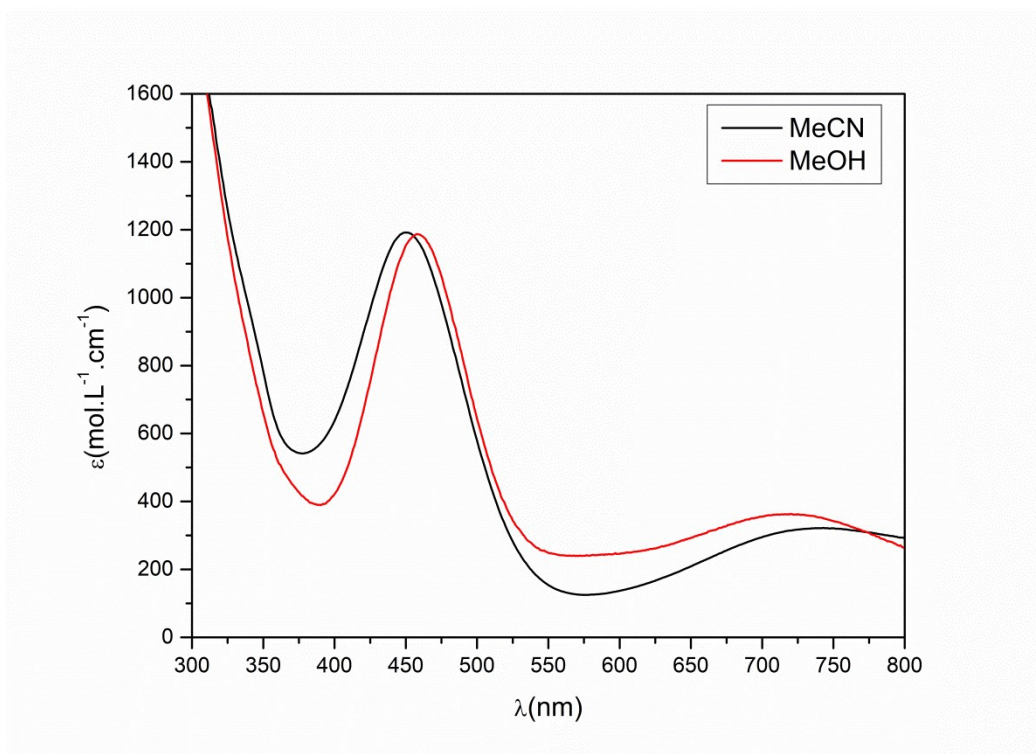

**Figure S10** Electronic spectrum of  $C_{Se}$  complex in acetonitrile solution in black and in methanol solution in red.

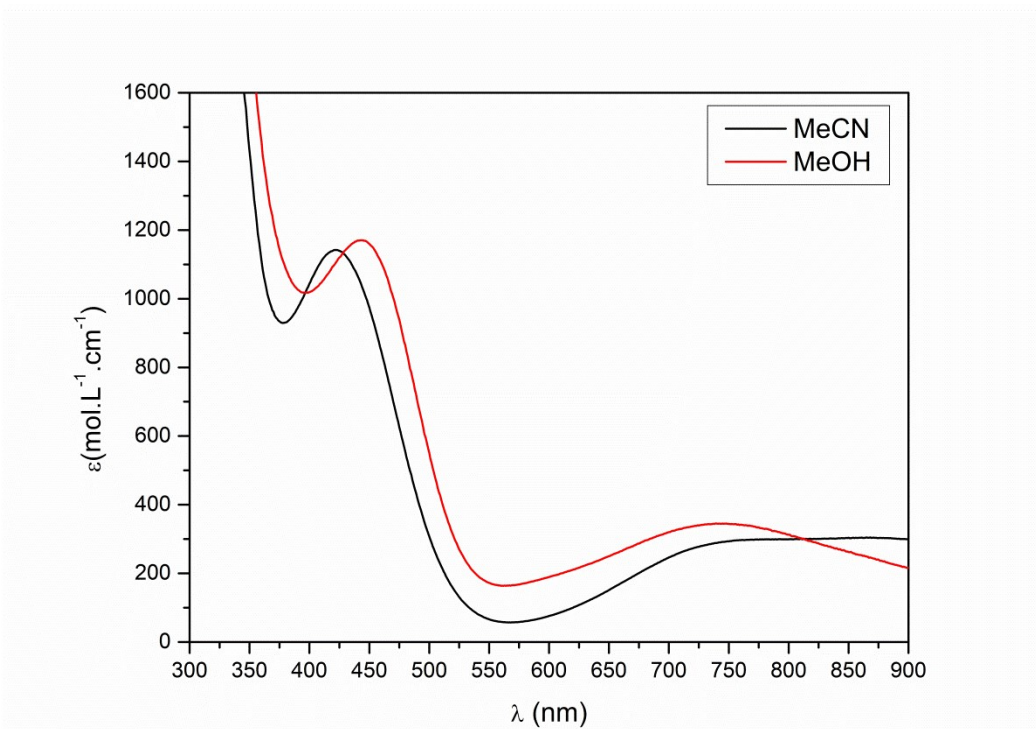

**Figure S11** Electronic spectrum of  $C_s$  complex in acetonitrile solution in black and in methanol solution in red.

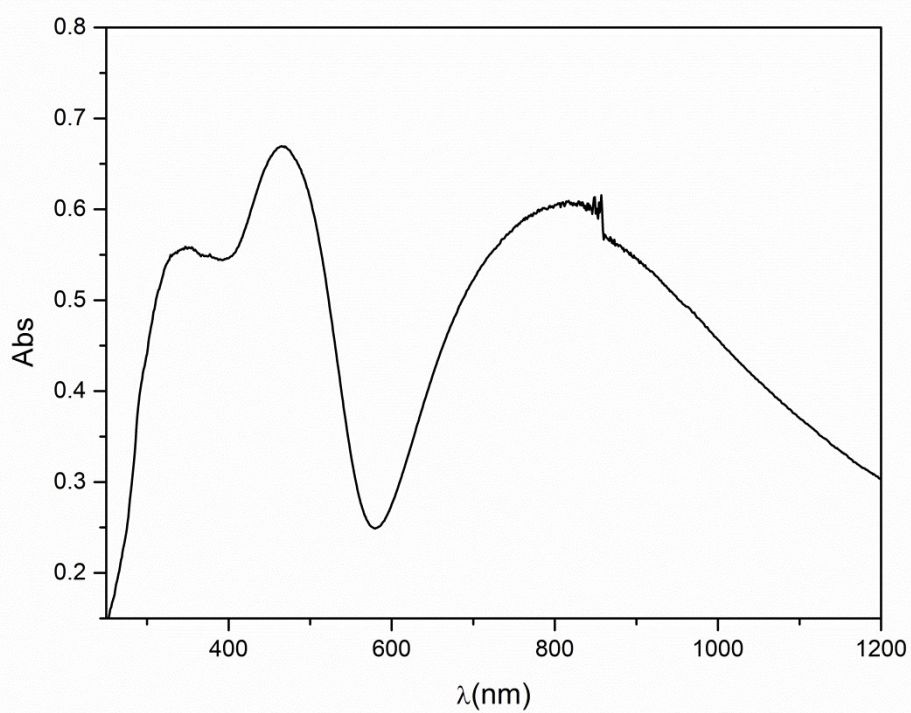

**Figure S12** Electronic spectrum of C<sub>Se</sub> in KBr pellet.

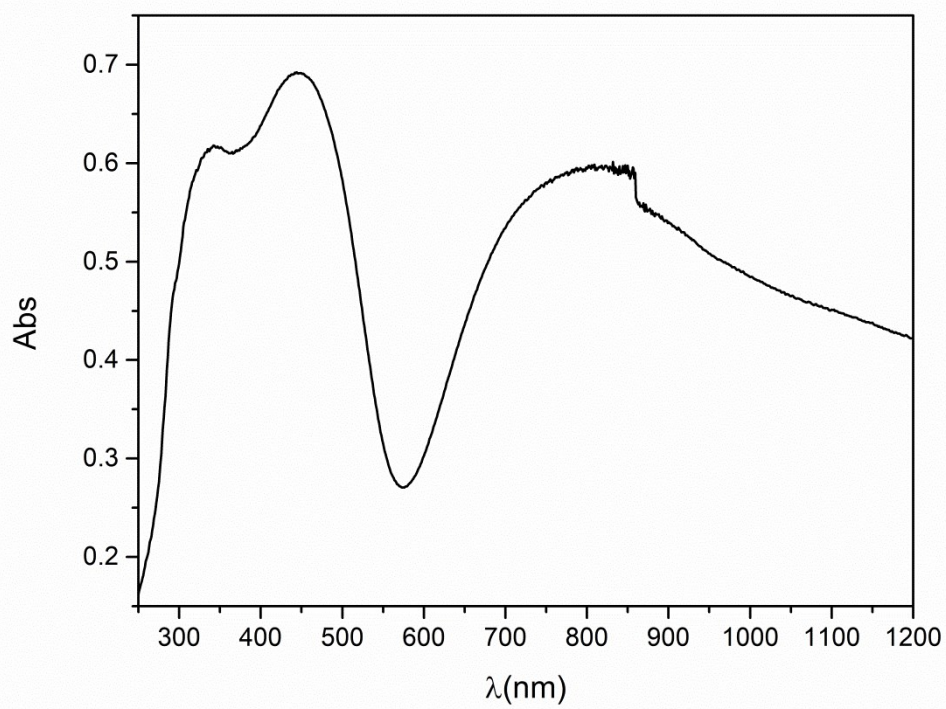

**Figure S13** Electronic spectrum of C<sub>S</sub> in KBr pellet.

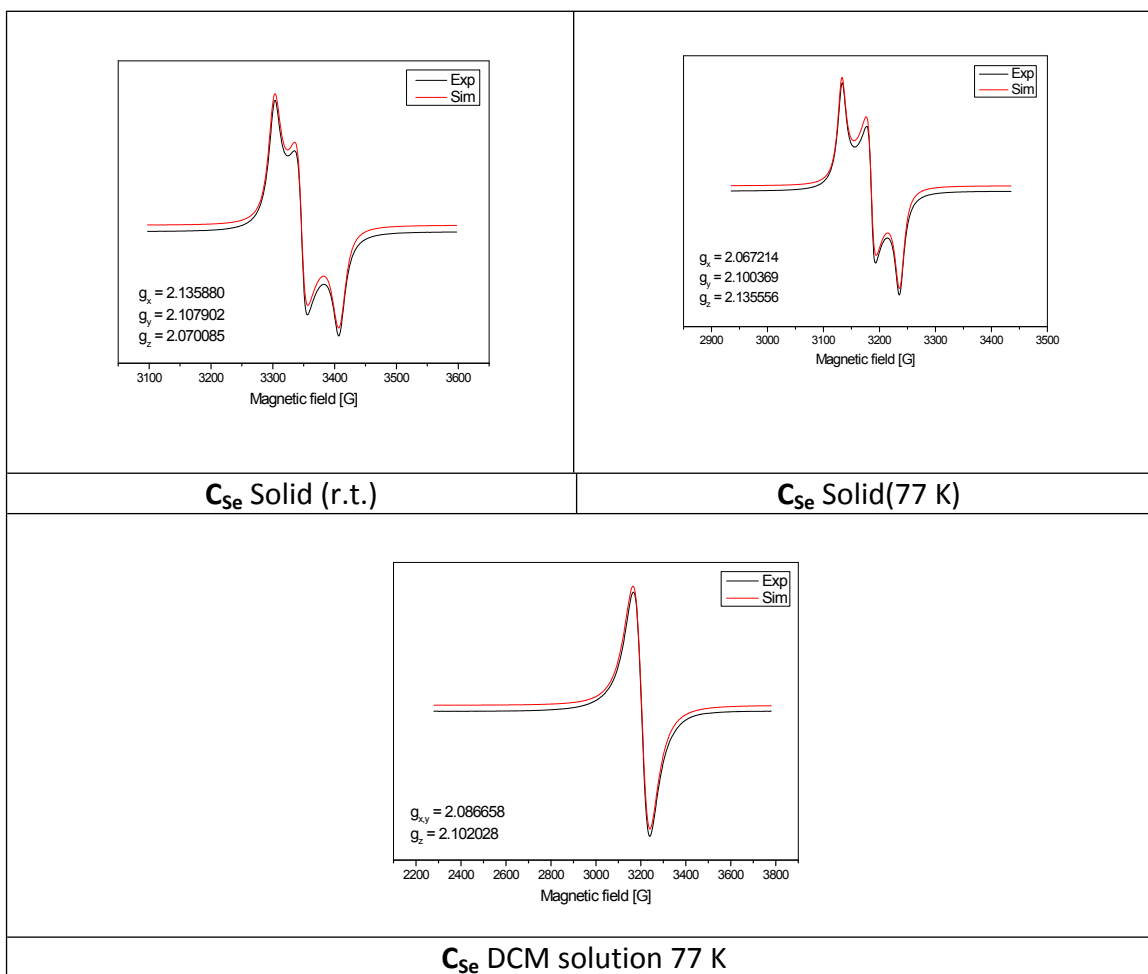

**Figure S14** EPR Spectra of C<sub>Se</sub> complex.

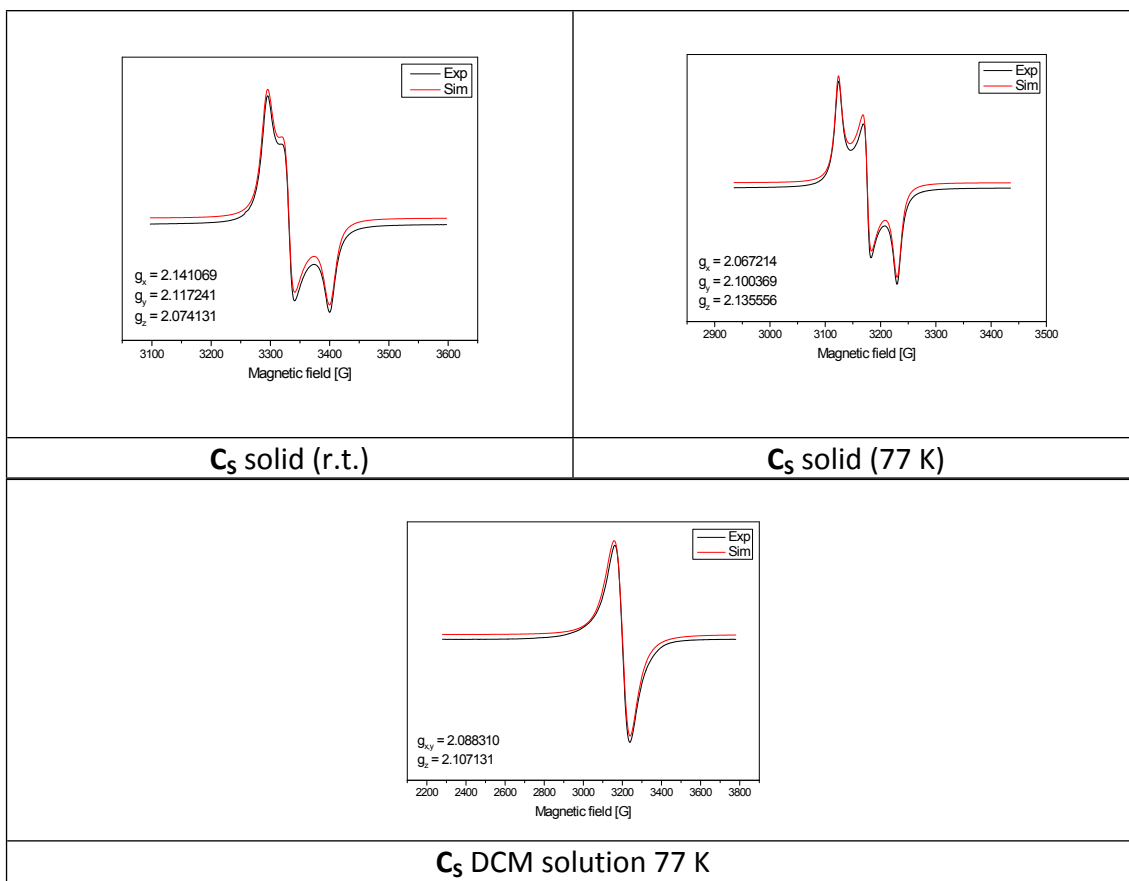

**Figure S15** EPR Spectra of C<sub>5</sub> complex.

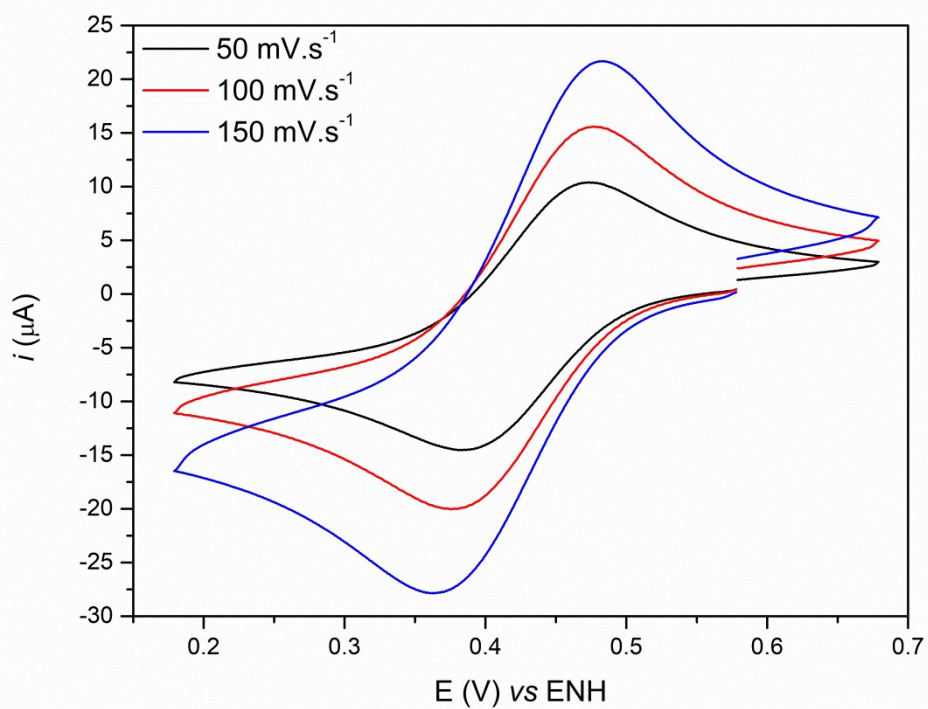

**Figure S16** Cyclic voltammetry of complex  $C_{se}$  in methanol. Conditions: working electrode (carbon); reference electrode ( $Ag/Ag^+$ ); auxiliary electrode (Pt); supporting electrolyte  $TBAPF_6$   $0.1 \text{ mol L}^{-1}$ .



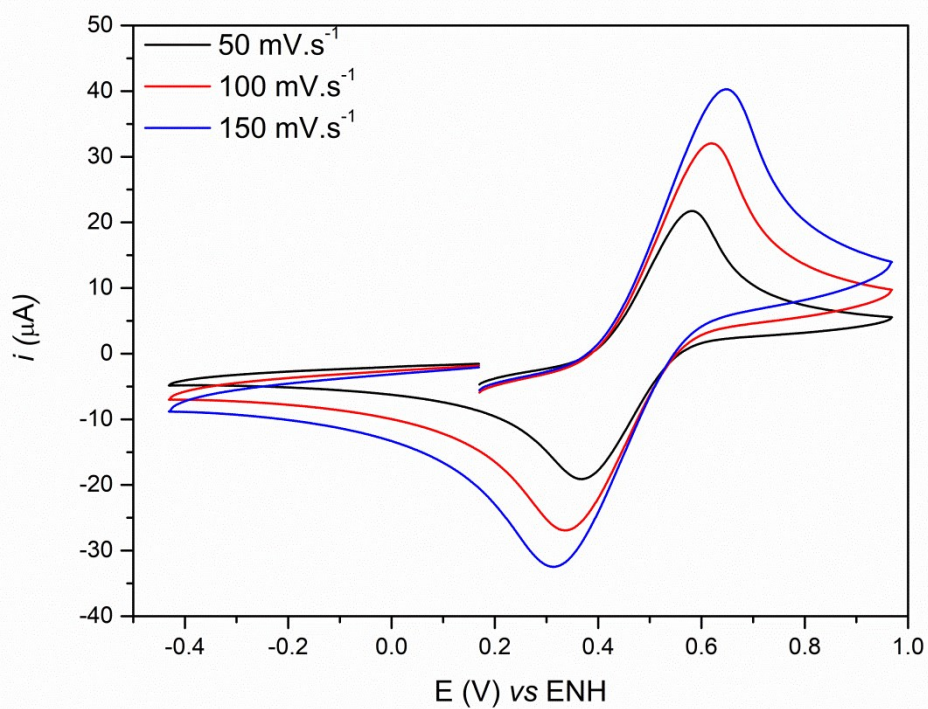

**Figure S17** Cyclic voltammetry of complex  $C_5$  in methanol. Conditions: working electrode (carbon); reference electrode ( $\text{Ag}/\text{Ag}^+$ ); auxiliary electrode (Pt); supporting electrolyte  $\text{TBAPF}_6$   $0.1 \text{ mol L}^{-1}$ .

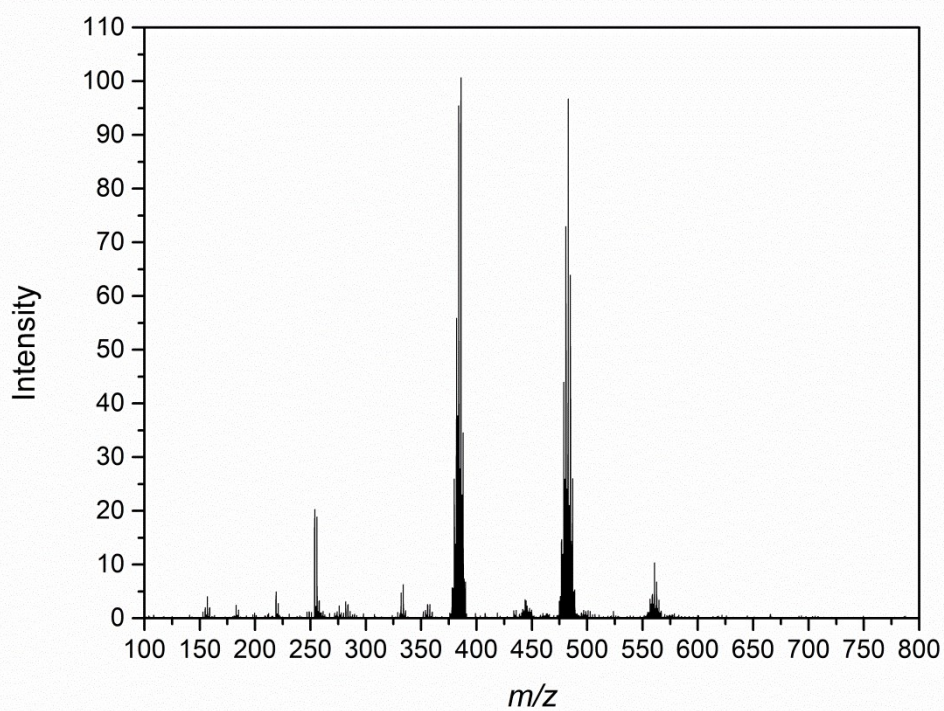

**Figure S18** ESI-MS spectrum (positive mode) in methanol of  $C_{Se}$ .

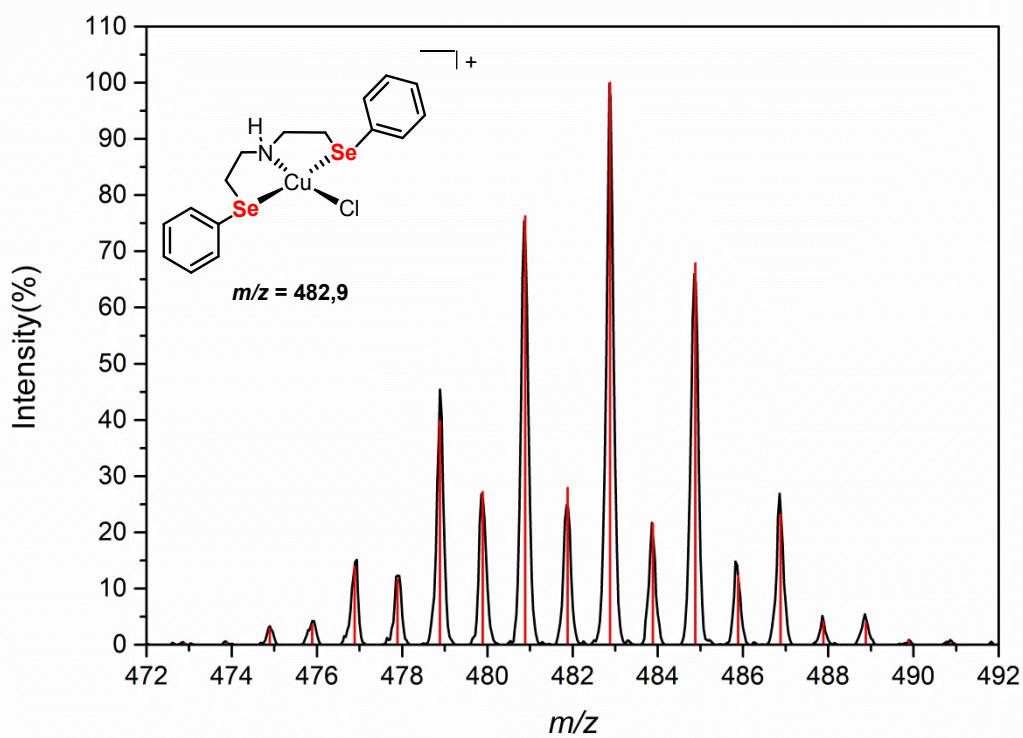

**Figure S19** Calculated (red) and experimental (black) isotopic distributions for the species present in the electrospray of  $C_{Se}$ .

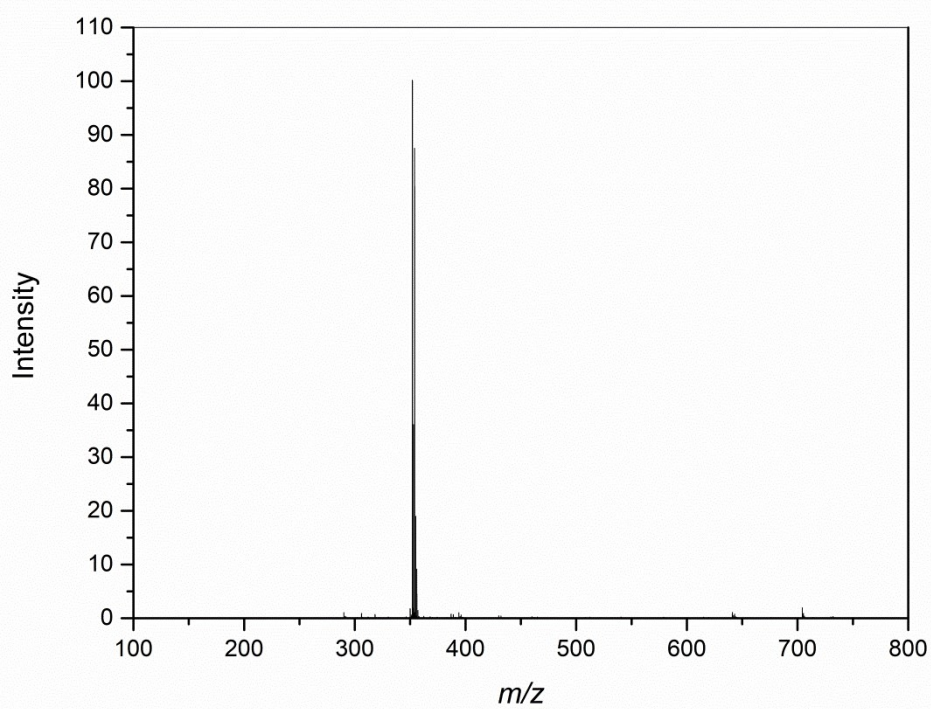

**Figure S20** ESI-MS spectrum (positive mode) in methanol of  $C_5$ .

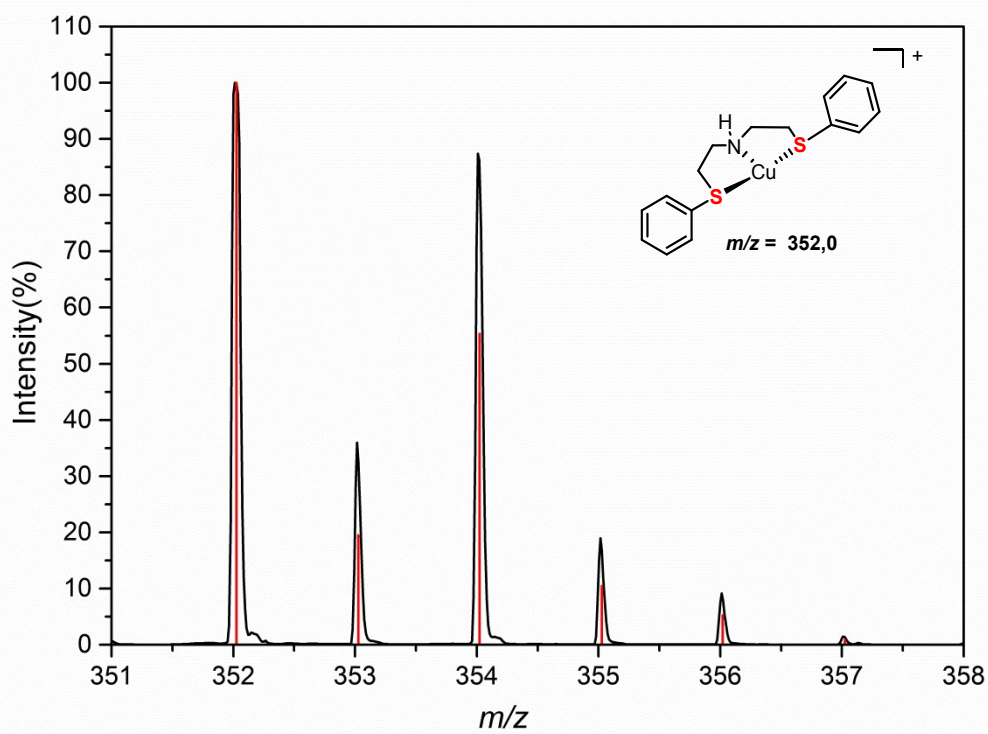



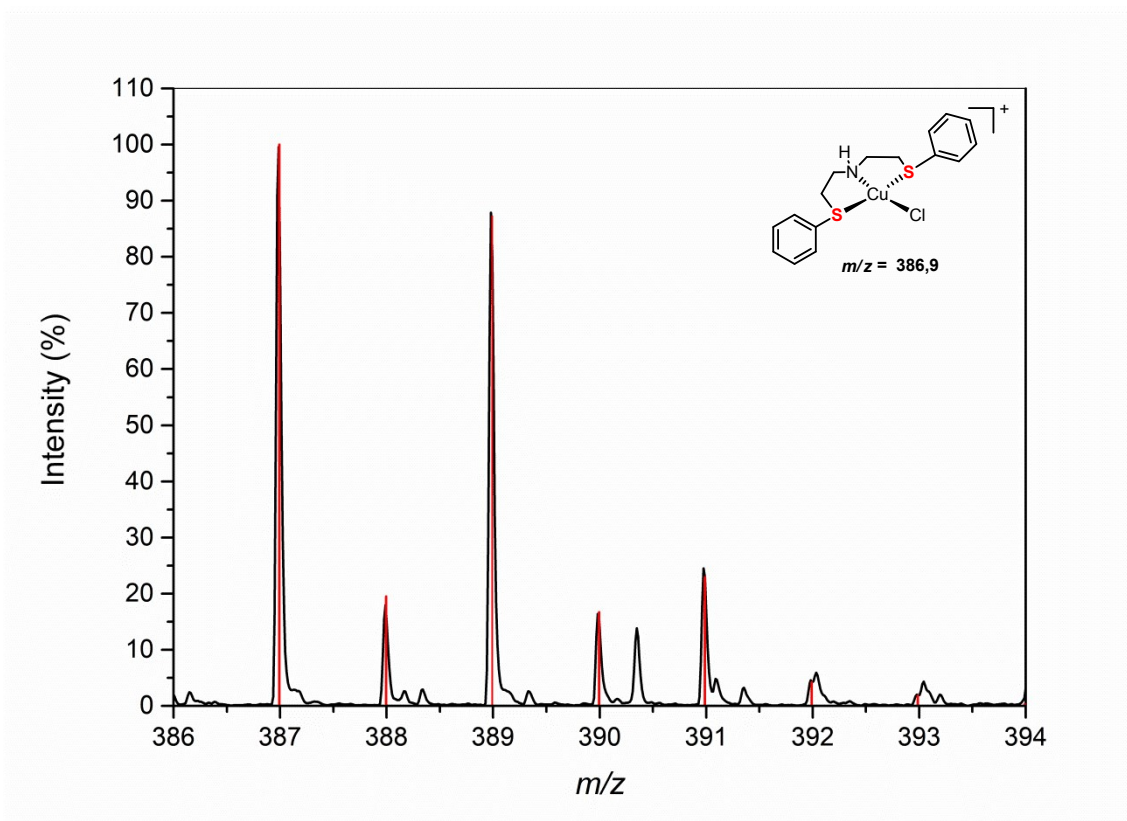

**Figure S21** Calculated (red) and experimental (black) isotopic distributions for the species present in the electrospray of  $C_S$ .

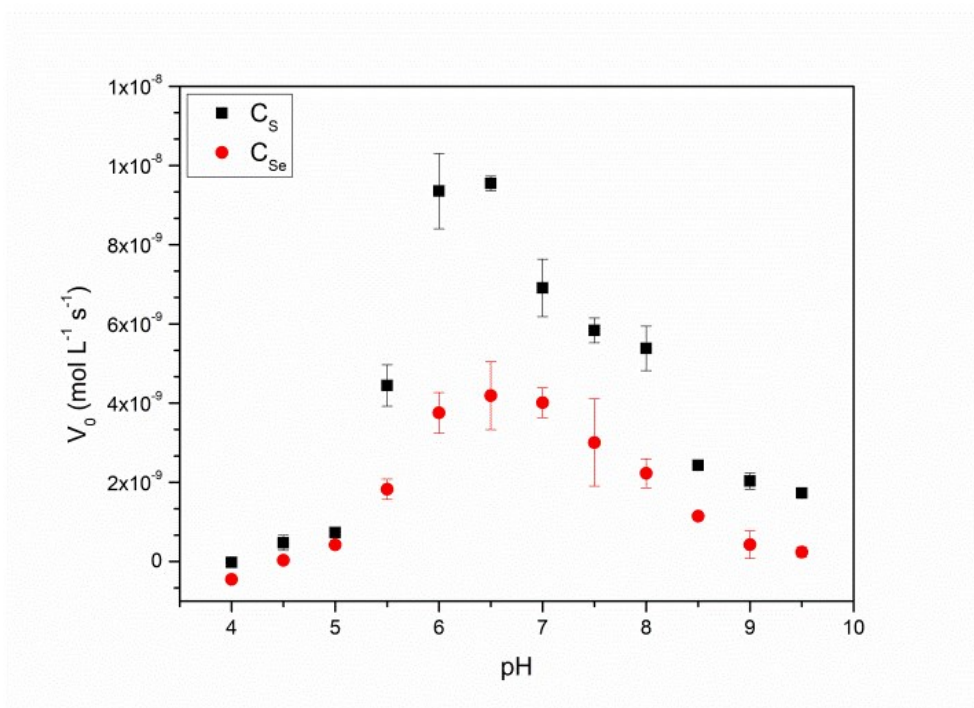

**Figure S 22** Graph showing the pH dependence in the hydrolysis of 2,4- BDNPP by complexes  $C_{Se}$  and  $C_S$ .

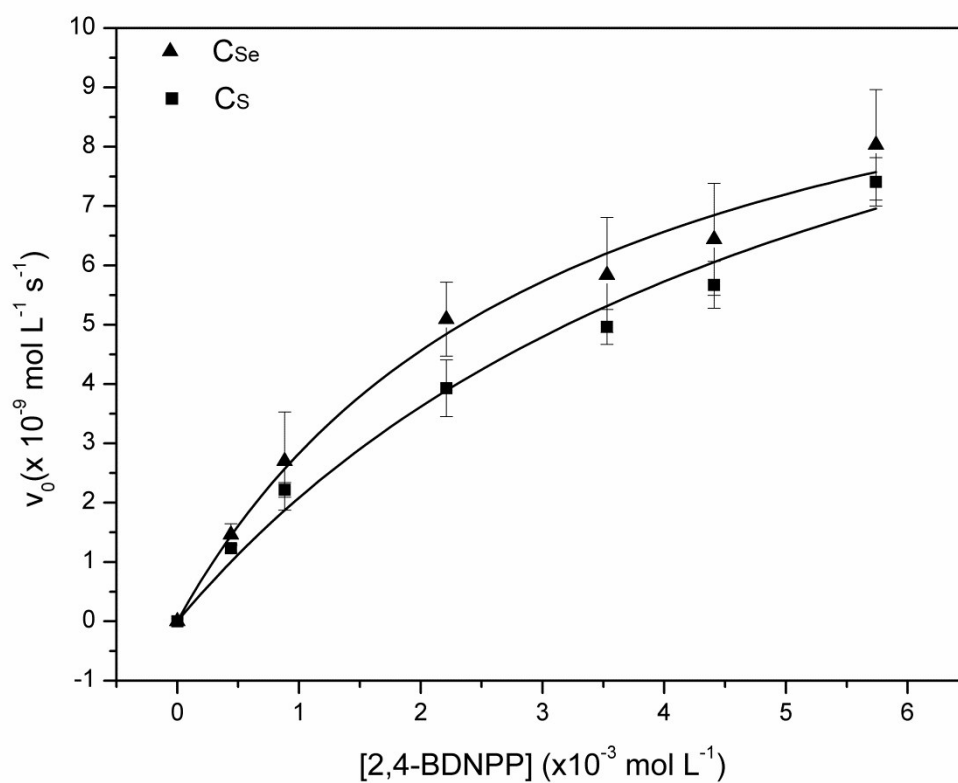

**Figure S 23** Dependence of substrate 2,4-BDNPP concentration for  $C_s$  and  $C_{Se}$  complexes at 25 ° C and pH 6.5. MeCN/H<sub>2</sub>O solution 50:50% v/v; [complex] =  $7.0 \times 10^{-5} \text{ mol L}^{-1}$ ; [substrate] =  $4.0 \times 10^{-4}$  to  $6.0 \times 10^{-3}$  and [Buffer]=  $0.05 \text{ mol L}^{-1}$ .

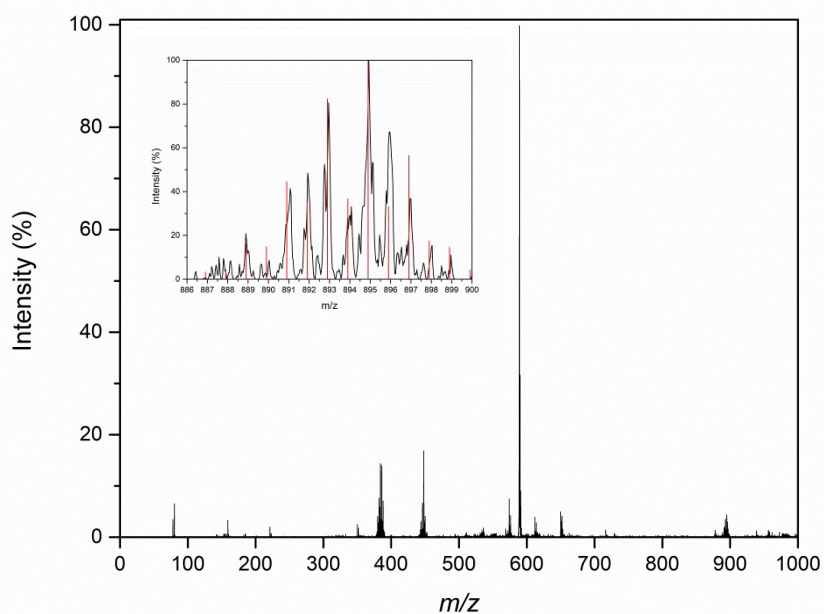

**Figure S24** ESI-MS analysis of the  $C_{se}$  in the presence of the substrate 2,4-BDNPP an acetonitrile/water (1:1, v/v), the expanding spectrum refers to the species:  $[Cu(L_{se})(OH)(2,4-BDNPP)] + H^+$

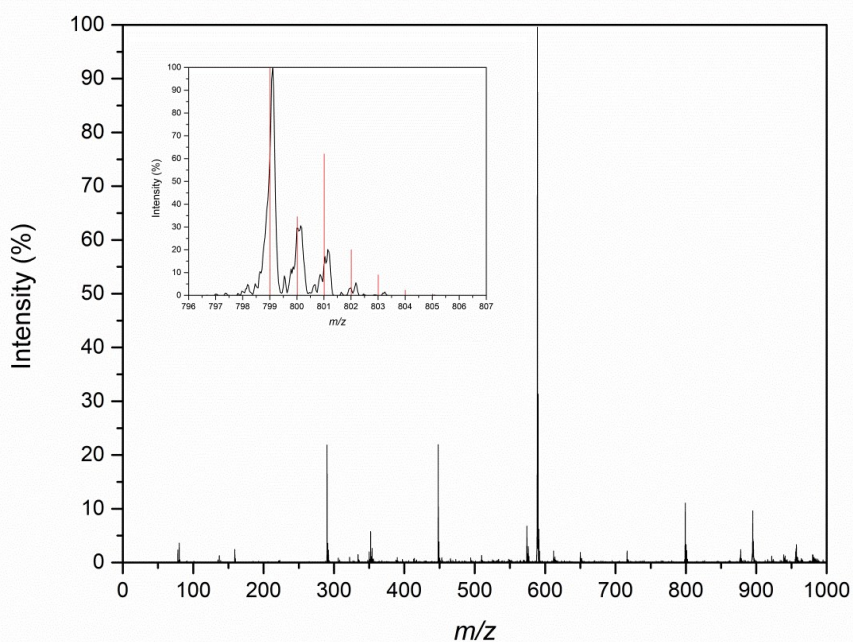

**Figure S25** ESI-MS analysis of the  $C_s$  in the presence of the substrate 2,4-BDNPP an acetonitrile/water (1:1, v/v), the expanding spectrum refers to the species:  $[Cu(L_s)(OH)(2,4-BDNPP)] + H^+$ .

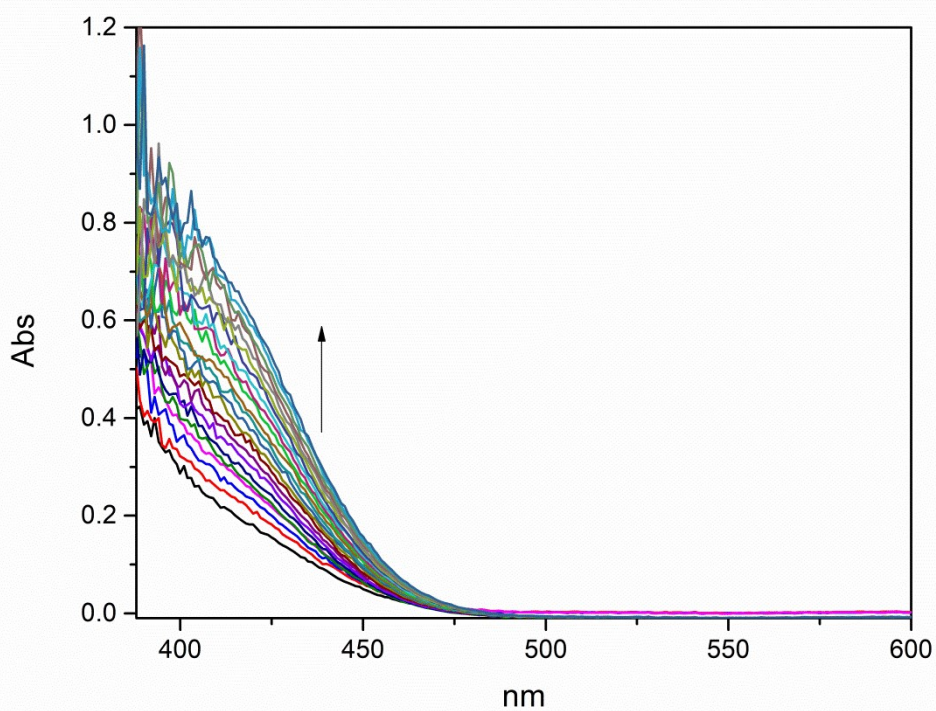

**Figure S26** Spectral variation observed during the hydrolysis of the substrate 2,4-BDNPP promoted by the  $C_5$  complex. Conditions: pH 6.5; 25 °C; MeCN / H<sub>2</sub>O solution (1: 1 v / v); [complex] =  $8.0 \times 10^{-5}$  mol L<sup>-1</sup>; [substrate] =  $8.0 \times 10^{-3}$  mol L<sup>-1</sup>; [buffer] = 0.05 mol L<sup>-1</sup>. The duration of the spectral variation experiment was 4 hours with an interval of 10 minutes between two spectral scans.

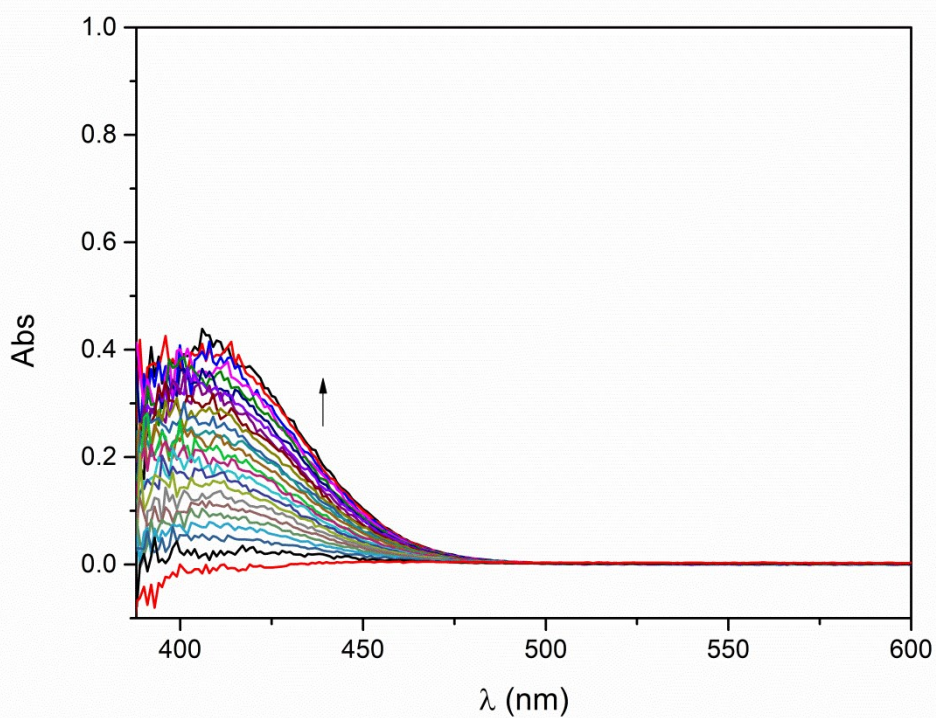

**Figure S27** Spectral variation observed during the hydrolysis of the substrate 2,4-BDNPP promoted by the  $C_{Se}$  complex. Conditions: pH 6.5; 25 °C; MeCN / H<sub>2</sub>O solution (1: 1 v / v); [complex] =  $8.0 \times 10^{-5}$  mol L<sup>-1</sup>; [substrate] =  $8.0 \times 10^{-3}$  mol L<sup>-1</sup>; [buffer] = 0.05 mol L<sup>-1</sup>. The duration of the spectral variation experiment was 4 hours with an interval of 10 minutes between two spectral scans.



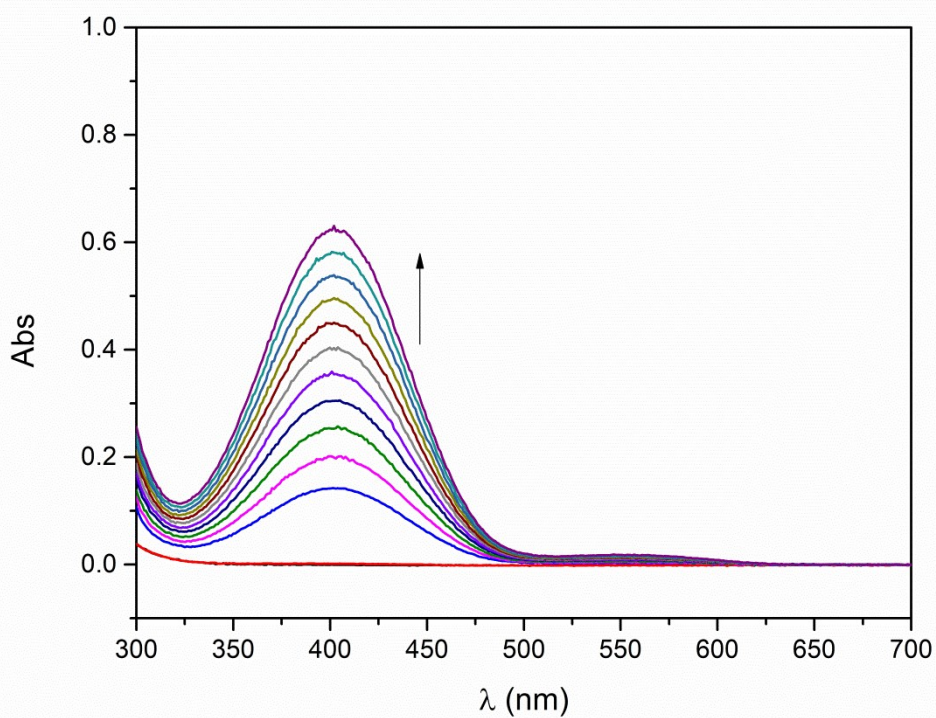

**Figure S28** Spectral variation observed during the oxidation of the substrate 3,5-DTBC promoted by the  $C_{Se}$  complex. Conditions: pH 7; 25 ° C; MeOH / H<sub>2</sub>O solution (97: 3% v / v); [complex] =  $3.0 \times 10^{-5}$  mol L<sup>-1</sup>; [substrate] =  $3.0 \times 10^{-3}$  mol L<sup>-1</sup>; [buffer] = 0.03 mol L<sup>-1</sup>. The duration of the spectral variation experiment was 1 hour with an interval of 5 minutes between two spectral scans.

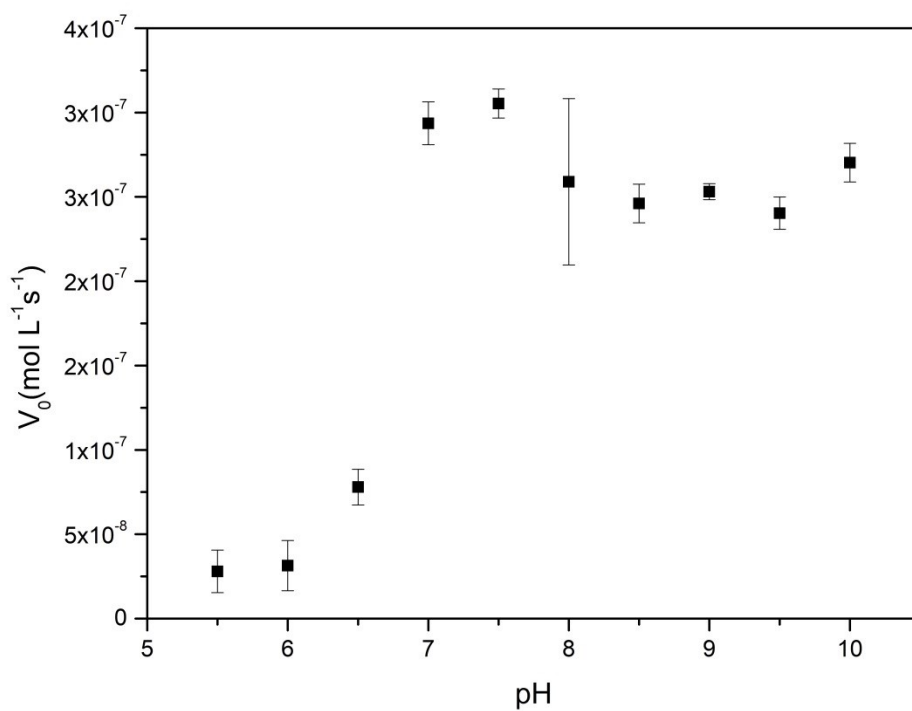

**Figure S29** Plots of  $v_0$  versus pH of  $C_{se}$  complex for 3,5-DTBC substrate oxidation reaction at 25 ° C. MeOH / H<sub>2</sub>O solution: 97: 3% v / v; [complex] =  $2.0 \times 10^{-5}$  mol L<sup>-1</sup>; [substrate] =  $2.4 \times 10^{-3}$  mol L<sup>-1</sup>; [buffer] = 0.03 mol L<sup>-1</sup>. (MES - pH 5.5 at 6.5, TRIS - pH 7.0 at 10.0).

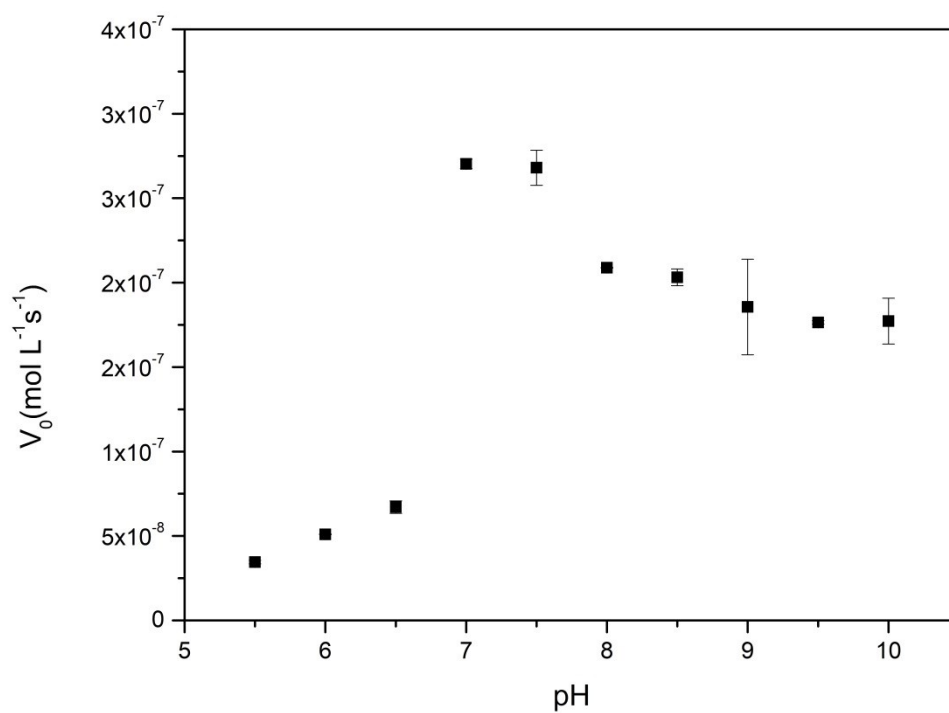

**Figure S30** Plots of  $v_0$  versus pH of  $C_S$  complex for 3,5-DTBC substrate oxidation reaction at 25 °C. MeOH / H<sub>2</sub>O solution 97: 3% v / v; [complex] =  $2.0 \times 10^{-5} \text{ mol L}^{-1}$ ; [substrate] =  $2.4 \times 10^{-3} \text{ mol L}^{-1}$ ; [buffer] =  $0.03 \text{ mol L}^{-1}$ . (MES - pH 5.5 at 6.5, TRIS - pH 7.0 at 10.0).

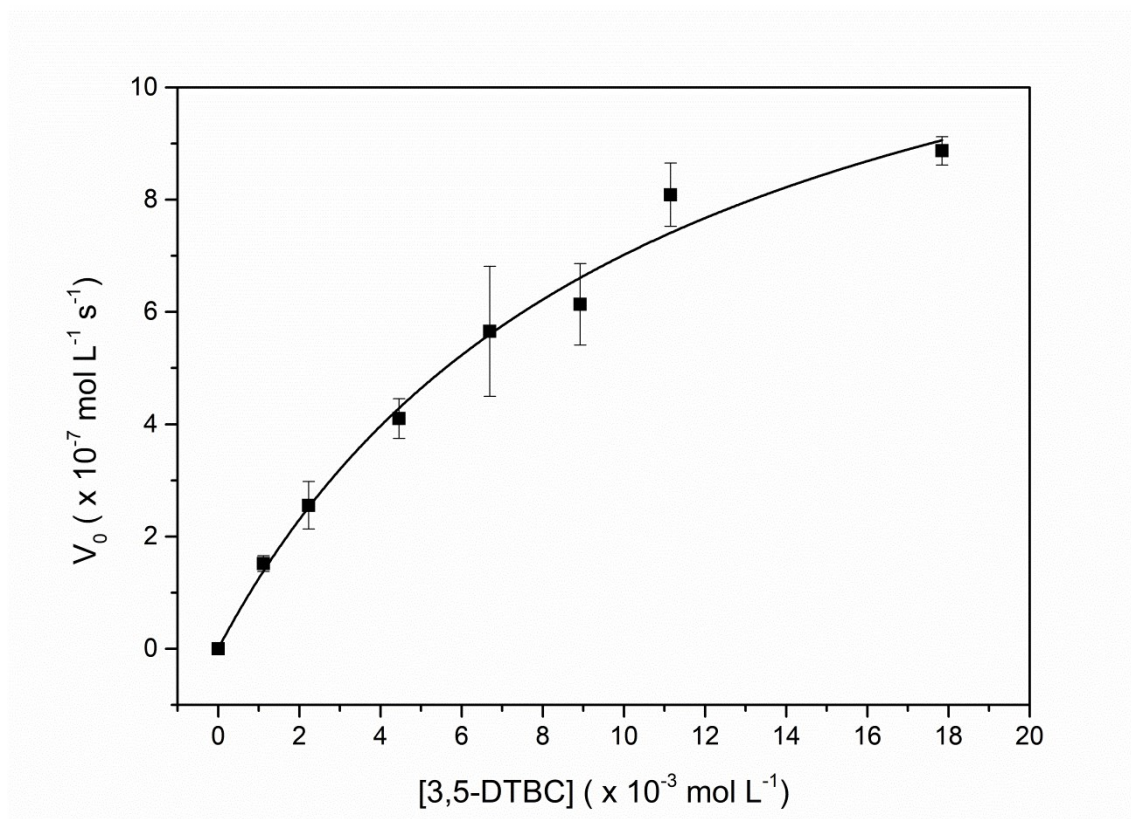

**Figure S31** Dependence on oxidation reaction rate of 3,5 - DTBC with substrate concentration for  $C_S$  complex at 25 °C and pH 7. MeOH / H<sub>2</sub>O solution 97:3% v / v; [complex] =  $3.3 \times 10^{-5} \text{ mol L}^{-1}$ ; [substrate] =  $11.15 \times 10^{-4}$  to  $17.84 \times 10^{-3} \text{ mol L}^{-1}$ ; [buffer] =  $0.03 \text{ mol L}^{-1}$ .



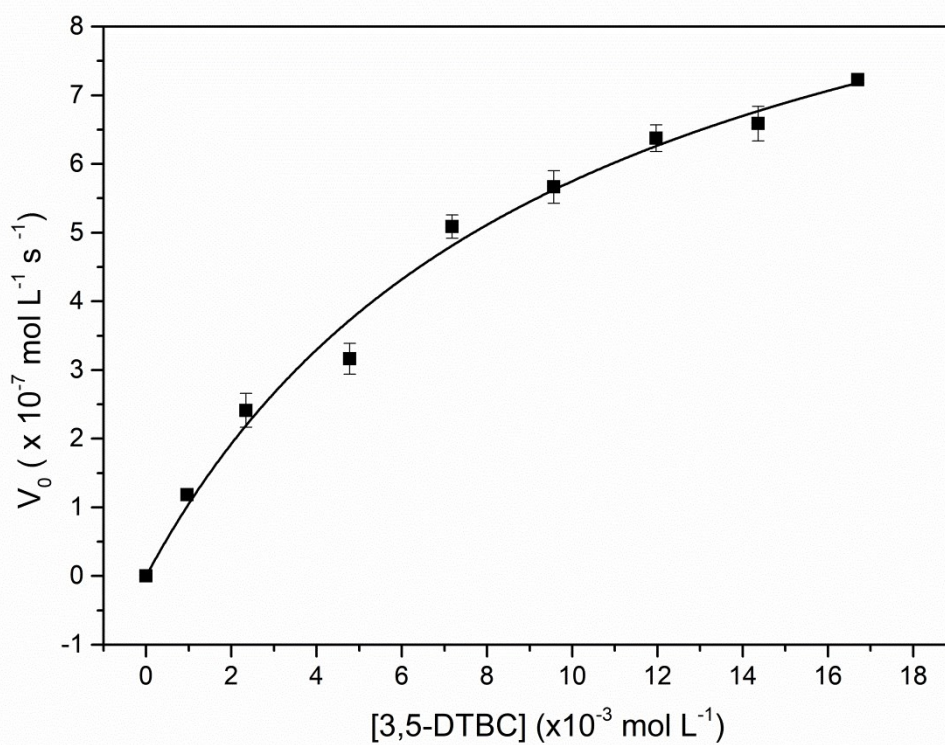

**Figure S32** Dependence on oxidation reaction rate of 3,5 - DTBC with substrate concentration for  $C_{Se}$  complex at 25 ° C and pH 7. MeOH / H<sub>2</sub>O solution 97: 3% v / v; [complex] =  $2.0 \times 10^{-5} \text{ mol L}^{-1}$ ; [substrate] =  $9.57 \times 10^{-4}$  to  $16.7 \times 10^{-3} \text{ mol L}^{-1}$ ; [buffer] =  $0.03 \text{ mol L}^{-1}$ .

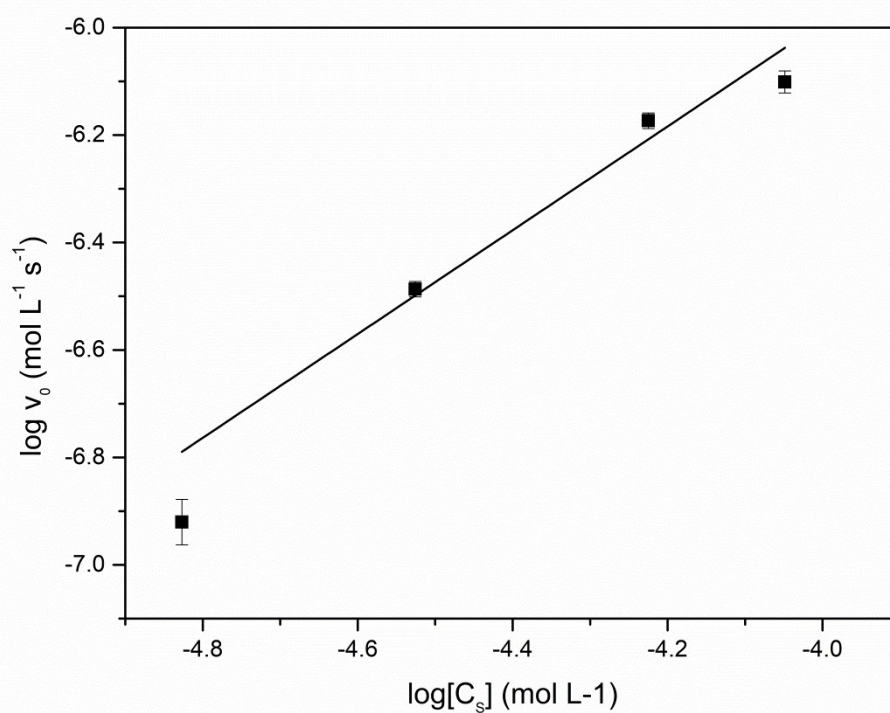

**Figure S33** Dependence on oxidation reaction rate of 3,5 - DTBC with substrate concentration for  $C_5$  complex at 25 °C and pH 7. MeOH / H<sub>2</sub>O solution 97: 3% v / v; [complex] =  $2.0 \times 10^{-5}$  mol L<sup>-1</sup>; [substrate] =  $9.0 \times 10^{-4}$  to  $1.6 \times 10^{-3}$  mol L<sup>-1</sup>; [buffer] = 0.03 mol L<sup>-1</sup>.

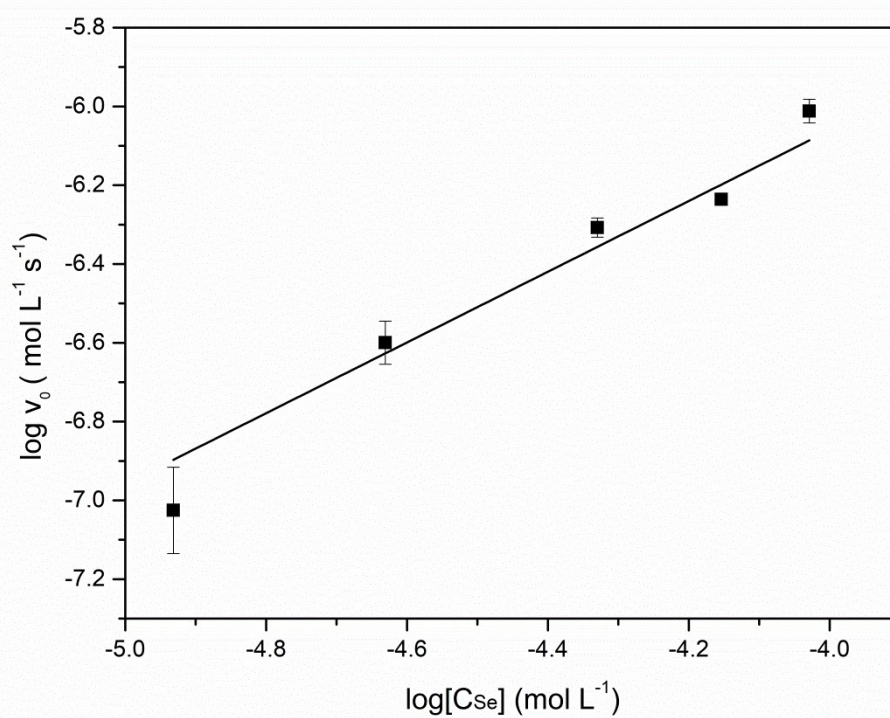

**Figure S34** Dependence on oxidation reaction rate of 3,5-DTBC with substrate concentration for  $C_{se}$  complex at 25 °C and pH 7. MeOH / H<sub>2</sub>O solution 97: 3% v / v; [complex] =  $2.0 \times 10^{-5}$  mol L<sup>-1</sup>; [substrate] =  $9.0 \times 10^{-4}$  to  $1.6 \times 10^{-3}$  mol L<sup>-1</sup>; [buffer] = 0.03 mol L<sup>-1</sup>.
